# Supplementary material for: Calculated and structural analyses of self-assembly formed by [7]thiaheterohelicene-2,13-carboxaldehyde molecules on Au(111)
Source: Royal Society of Chemistry journal article supplement (doi:10.1039/d4cp03235g), 2024-10-10
Supplement: d4cp03235g1.pdf [file d4cp03235g1.pdf]

### Supporting information for

#### Calculated and structural analysis of self-assembly formed by [7]thiaheterohelicene-2,13-carboxaldehyde molecules on Au(111)

Nadia El Hasnaoui <sup>a,b</sup>, Xavier Bouju <sup>c</sup>, Youness Benjalal <sup>a,b</sup>

<sup>a</sup> Department of Chemistry, Polydisciplinary Faculty, Sultan Moulay Slimane University, P.O. Box 592, Mghila, Beni-Mellal 23000, Morocco.

<sup>b</sup> Chemical Science and Engineering Research Team (ERSIC), Polydisciplinary Faculty, Sultan Moulay Slimane University, P.O. Box 592, Mghila, Beni-Mellal 23000, Morocco. E-mail: y.benjalal@usms.ma

<sup>c</sup> CEMES-CNRS, Université de Toulouse III - Paul Sabatier, Toulouse, France. E-mail: xavier.bouju@cesm.fr

#### Computational methods

In order to predict adsorption geometries of molecules on a surface, we have performed calculations based on the atom-superposition and electron-delocalization molecular-orbital method.

#### Computational details

Calculations were performed by using numerical methods based on Hückel molecular orbital theory. Atomic orbitals parameters are given in the following table with ionization potential (IP) in eV and Slater orbital exponents ( $\xi$ ) in au.

| atom | orbital | IP (eV) | $\xi_1$ | $c_1$ | $\xi_2$ | $c_2$  |
|------|---------|---------|---------|-------|---------|--------|
| C    | 2s      | -21.4   | 1.625   | 1.0   |         |        |
|      | 2p      | -11.4   | 1.625   | 1.0   |         |        |
| H    | 1s      | -13.6   | 1.300   | 1.0   |         |        |
| O    | 2s      | -32.3   | 2.275   | 1.0   |         |        |
|      | 2p      | -14.8   | 2.275   | 1.0   |         |        |
| S    | 3s      | -20.0   | 1.817   | 1.0   |         |        |
|      | 3p      | -13.3   | 1.817   | 1.0   |         |        |
| Au   | 6s      | -10.92  | 2.602   | 1.0   |         |        |
|      | 6p      | -5.55   | 2.584   | 1.0   |         |        |
|      | 5d      | -15.07  | 6.163   | 0.685 | 2.794   | 0.5696 |

For the van der Waals interaction between the surface atoms and the molecule, we used the method described in F. Ample and C. Joachim, Surface Science **602** (2008) 1563–1571, with the standard MM4 parameters

| atom | $r$ (Å) | $\epsilon$ (kcal/mol) |
|------|---------|-----------------------|
| C    | 1.96    | 0.057                 |
| H    | 1.60    | 0.017                 |
| O    | 1.76    | 0.060                 |
| S    | 2.09    | 0.196                 |
| Au   | 2.43    | 0.625                 |
